# Supplementary material
Source: PubMed Central journal article supplement (PMC8127054)
Supplement: ciz790_suppl_supplementary_materials.pdf [file ciz790_suppl_supplementary_materials.pdf]

1 **Suppl. Table 1. Resistance profile of MDR-TB cases in Shenzhen, stratified by**  
 2 **lineages**

|                             | Total       | Modern Beijing | Ancient Beijing | Non-Beijing | Chi square statics |         |
|-----------------------------|-------------|----------------|-----------------|-------------|--------------------|---------|
|                             | N=417       | N=216          | N=135           | N=66        | $\chi^2$           | p value |
| Genetic resistance          |             |                |                 |             |                    |         |
| Non-MDR                     | 10 (2.40)   | 5 (2.31)       | 3 (2.22)        | 2 (3.03)    | 0.137              | 0.934   |
| MDR/RR                      | 274 (65.71) | 135 (62.50)    | 86 (63.70)      | 53 (80.30)  | 7.47               | 0.024   |
| Pre-XDR                     | 114 (27.34) | 64 (29.63)     | 41 (30.37)      | 9 (13.64)   | 7.43               | 0.024   |
| XDR                         | 19 (4.56)   | 12 (5.56)      | 5 (3.70)        | 2 (3.03)    | 1.08               | 0.584   |
| First-line drug resistance  |             |                |                 |             |                    |         |
| INH                         | 408 (97.84) | 213 (98.61)    | 132 (97.78)     | 63 (95.45)  | 2.39               | 0.303   |
| RIF                         | 407 (97.60) | 211 (97.69)    | 132 (97.78)     | 64 (96.97)  | 0.137              | 0.934   |
| SM                          | 277 (66.43) | 180 (83.33)    | 82 (60.74)      | 15 (22.73)  | 86.2               | <0.001  |
| EMB                         | 245 (58.75) | 134 (62.04)    | 80 (59.26)      | 31 (46.97)  | 4.76               | 0.093   |
| PZA                         | 112 (26.86) | 62 (28.70)     | 36 (26.67)      | 14 (21.21)  | 1.45               | 0.485   |
| Second-line drug resistance |             |                |                 |             |                    |         |
| FQ                          | 107 (25.66) | 58 (26.85)     | 39 (28.89)      | 10 (15.15)  | 4.72               | 0.094   |
| AMK                         | 45 (10.79)  | 31 (14.35)     | 12 (8.89)       | 2 (3.03)    | 7.48               | 0.024   |
| KAN                         | 28 (6.71)   | 14 (6.48)      | 10 (7.41)       | 4 (6.06)    | 0.167              | 0.920   |
| CPM                         | 23 (5.52)   | 12 (5.56)      | 10 (7.41)       | 1 (1.52)    | 2.95               | 0.228   |
| PAS                         | 31 (7.43)   | 11 (5.09)      | 18 (13.33)      | 2 (3.03)    | 10.4               | 0.005   |
| ETO                         | 54 (12.95)  | 40 (18.52)     | 5 (3.70)        | 9 (13.64)   | 16.2               | <0.001  |

3  
 4 \* Abbreviations of anti-TB drugs: isoniazid (INH), rifampin (RIF), streptomycin  
 5 (SM), ethambutol (EMB), pyrazinamide (PZA), fluoroquinolones (FQ), amikacin  
 6 (AMK), kanamycin (KAN), capreomycin (CPM), para-aminosalicylic acid (PAS),  
 7 ethionamide (ETO), linezolid (LZD), clofazimine (CFZ), and bedaquiline (BDQ)  
 8 \*\* No mutation was detected on the resistance genes for linezolid, clofazimine,  
 9 bedaquiline

10

11 **Suppl. Table 2. Epidemiological links of MDR-TB cases from large genomic-clusters ( $\geq 3$  cases)**

|            | Cluster size | Median age (years, [IQR]) | No. males | Risk factors              | No. patients living in the same district | Median Pairwise geographic distance (kilometers, [IQR]) | No. patients coming from the same county | No. patients receiving investigation | Known social links (n.)             | Epidemiological links |
|------------|--------------|---------------------------|-----------|---------------------------|------------------------------------------|---------------------------------------------------------|------------------------------------------|--------------------------------------|-------------------------------------|-----------------------|
| Cluster 02 | 6            | 28 (23-33)                | 5         | SZ(2)<br>FQ(2)            | 6                                        | 0.6 (0.6-1.0)                                           | 2,2                                      | 3                                    | Household (2)<br>Community (6)      | Yes                   |
| Cluster 03 | 3            | 36 (30-45)                | 2         | FQ(1)                     | 2                                        | 16 (1.3-16)                                             | 0                                        | 2                                    | Community (2)<br>Past community (2) | Probable              |
| Cluster 08 | 4            | 37 (21-52)                | 2         | SZ(1)<br>Stu.(1)<br>FQ(3) | 3                                        | 4.2 (4.0-4.8)                                           | 0                                        | 2                                    | Community (2)                       | Probable              |
| Cluster 10 | 4            | 40 (31-49)                | 3         | FQ(3)                     | 3                                        | 16 (7.0-24)                                             | 2                                        | 3                                    | Household (2)                       | Yes                   |
| Cluster 11 | 4            | 24 (23-39)                | 4         |                           | 2                                        | 18 (13-28)                                              | 0                                        | 0                                    | Unknown                             | ND                    |
| Cluster 12 | 3            | 41 (27-50)                | 2         |                           | 2                                        | 37 (1.7-38)                                             | 0                                        | 1                                    | Workplace (2)<br>Community (2)      | Yes                   |
| Cluster 14 | 5            | 33 (23-39)                | 3         | Stu.(1)<br>FQ(2)          | 3,2                                      | 21 (15-36)                                              | 2                                        | 1                                    | Community (2,2)<br>Source county(2) | Probable              |
| Cluster 17 | 4            | 36 (30-44)                | 2         | FQ(1)                     | 2                                        | 9.1 (6.6-15)                                            | 0                                        | 1                                    | Unknown                             | ND                    |
| Cluster 30 | 3            | 33 (30-49)                | 3         |                           | 3                                        | 5.8 (4.0-6.3)                                           | 0                                        | 0                                    | Community (2)                       | Probable              |
| Cluster 32 | 3            | 26 (25-28)                | 1         | FQ(1)                     | 0                                        | 45 (24-57)                                              | 0                                        | 1                                    | Unknown                             | ND                    |
| Cluster 44 | 4            | 26 (23-29)                | 1         | FQ(1)                     | 2                                        | 11 (1.8-13)                                             | 3                                        | 1                                    | Source county (3)                   | Probable              |
| Cluster 46 | 4*           | 17 (16-18)                | 2         | Stu.(3)<br>FQ(4)          | 0                                        | 38 (5.8-40)                                             | 2                                        | 2                                    | School (3)                          | Yes                   |
| Cluster 47 | 4            | 33 (19-51)                | 3         | Stu.(2)<br>FQ(4)          | 2,2                                      | 9.4 (8.2-17)                                            | 0                                        | 3                                    | School (3)                          | Yes                   |

12 \* Baseline data was missing for one case

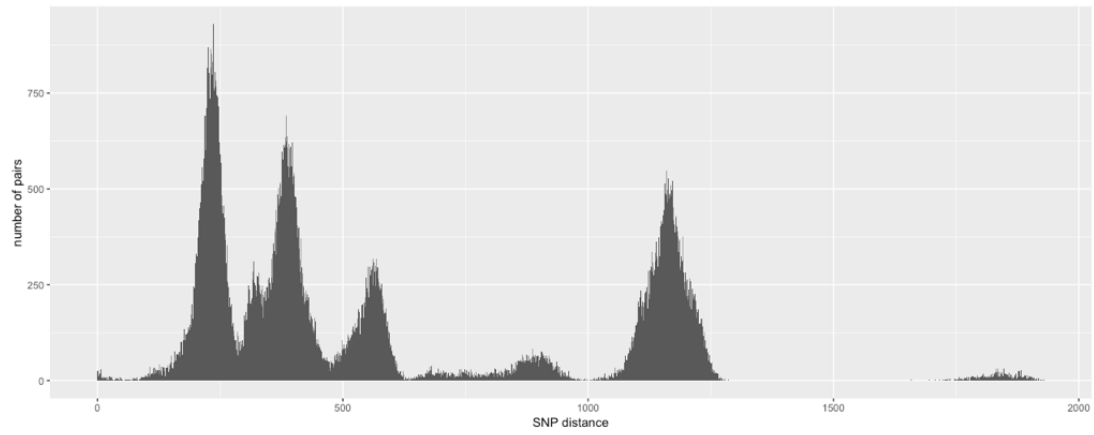

C.

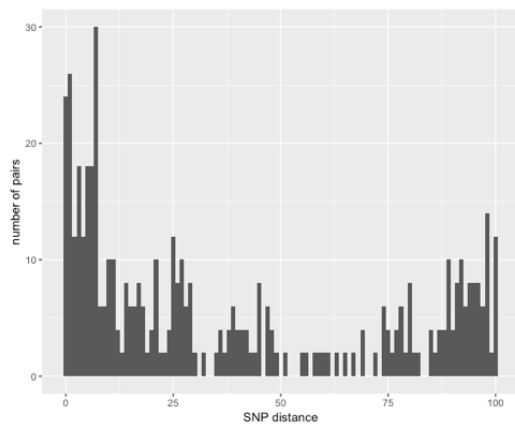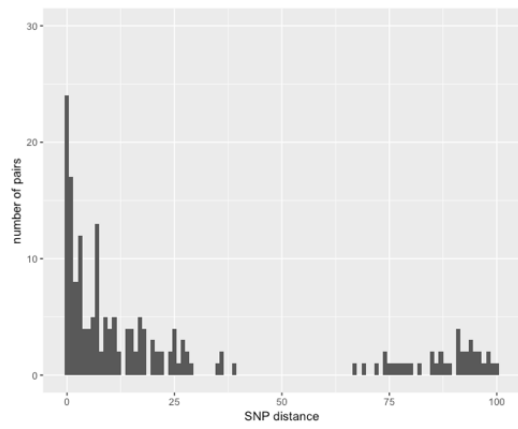

13

14 **Suppl. Figure 1.** SNP distribution of enrolled MDR strains. (A) Total distribution of

15 pairwise SNP distance. (B) Distribution of pairwise SNP distances  $\leq 100$ . (C)

16 Distribution of minimum SNP distance  $\leq 100$ .

17

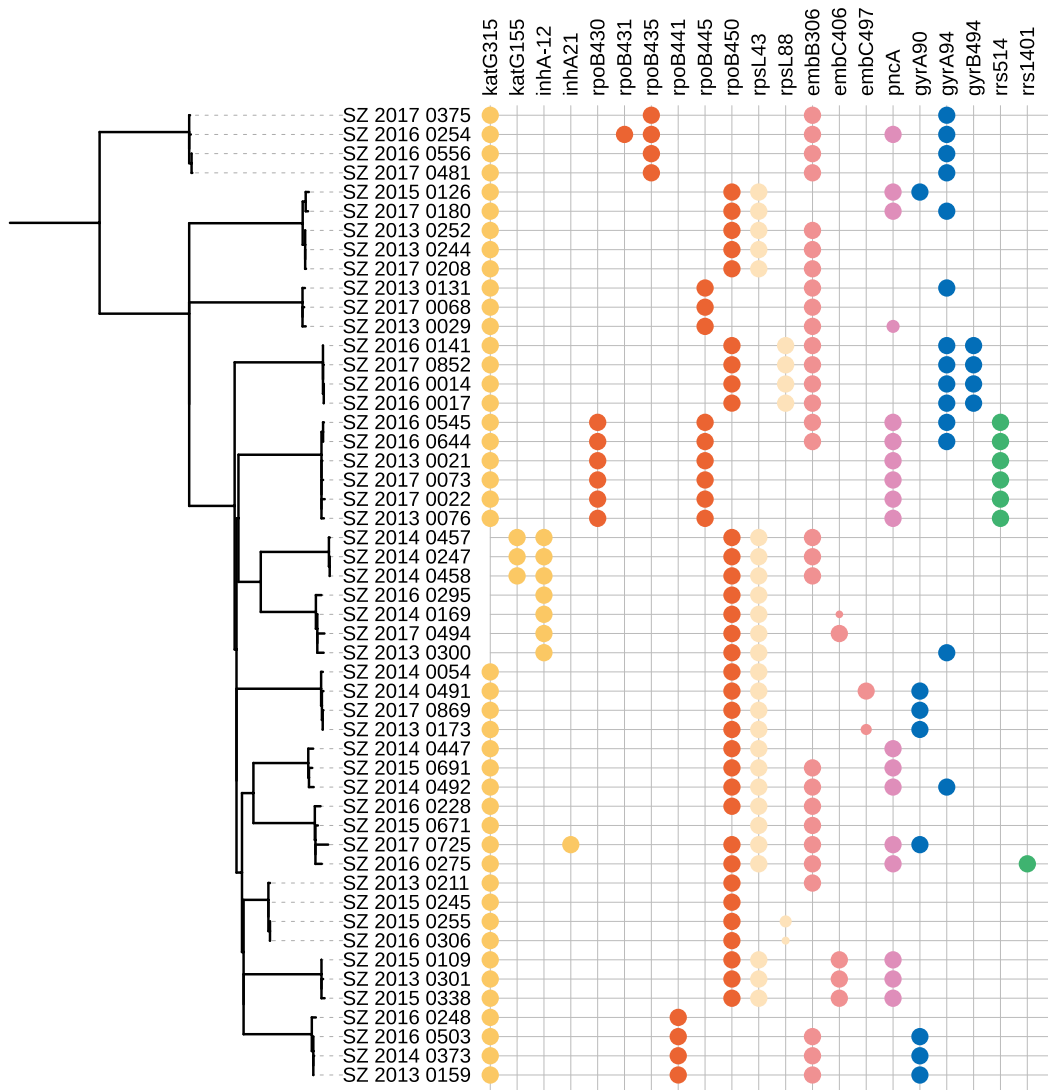

18

19 **Suppl. Figure 2.** Mutations associated with drug resistance found in strains belonging  
 20 to the 13 large clusters containing three or more cases
